# Supplementary material for: N6-methyladenosine modification promotes hepatocarcinogenesis through circ-CDYL-enriched and EpCAM-positive liver tumor-initiating exosomes
Source: PubMed Central journal article supplement — iScience. 2023 Oct 13;26(10):108022. doi: 10.1016/j.isci.2023.108022 (PMC10638478; doi:10.1016/j.isci.2023.108022), 2023-10-13
Supplement: mmc1.pdf [file mmc1.pdf]

**Supplemental information**

**N6-methyladenosine modification promotes  
hepatocarcinogenesis through circ-CDYL-enriched  
and EpCAM-positive liver tumor-initiating exosomes**

**Yanping Wei, Jingbo Fu, Hailing Zhang, Yan Ling, Xuewu Tang, Shuowu Liu, Miao Yu, Fuyan Liu, Guokun Zhuang, Haihua Qian, Kecheng Zhang, Pinhua Yang, Xinwei Yang, Qi Yang, Shennian Ge, Baohua Zhang, Yexiong Tan, Liang Li, and Hongyang Wang**

**A**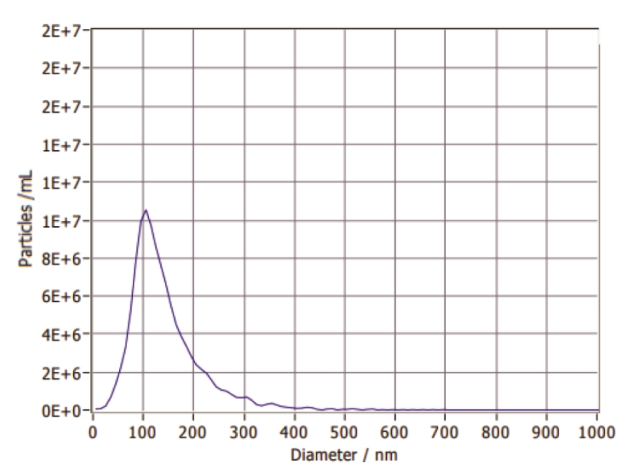**B**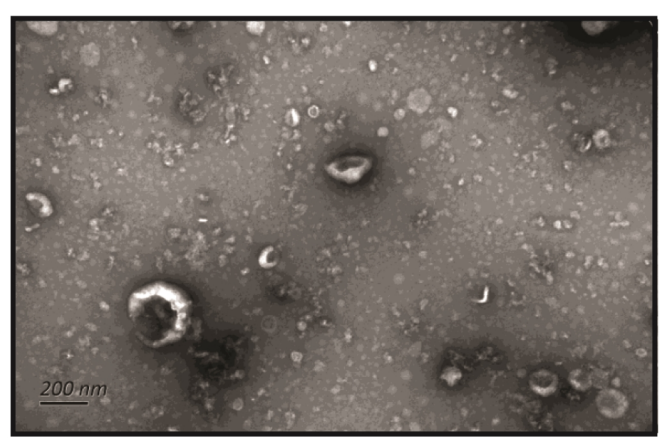**C**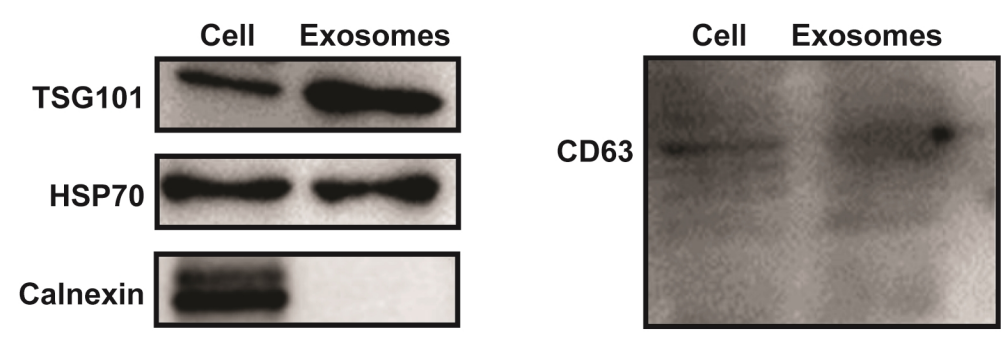**Figure S1**

**A**

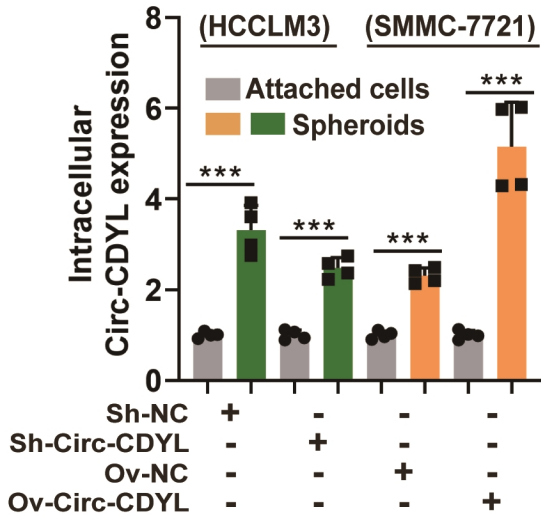

**B**

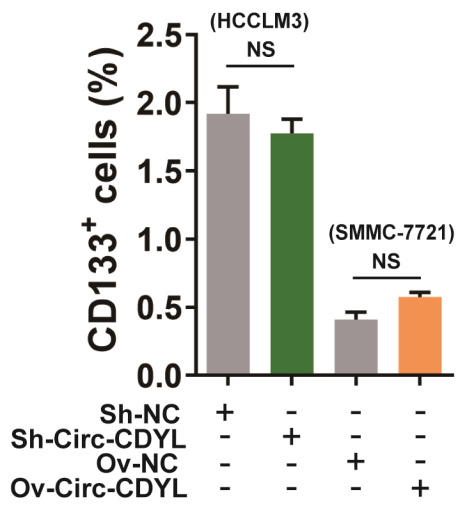

**C**

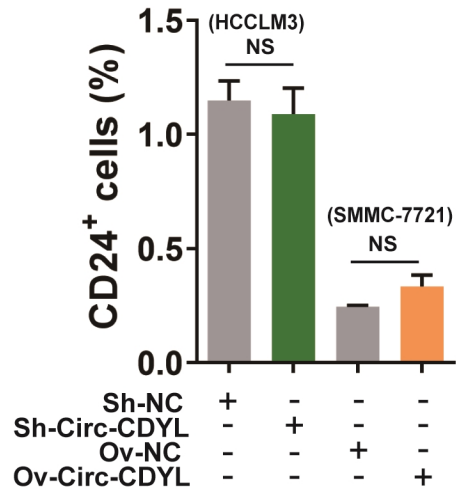

**Figure S2**

**A**

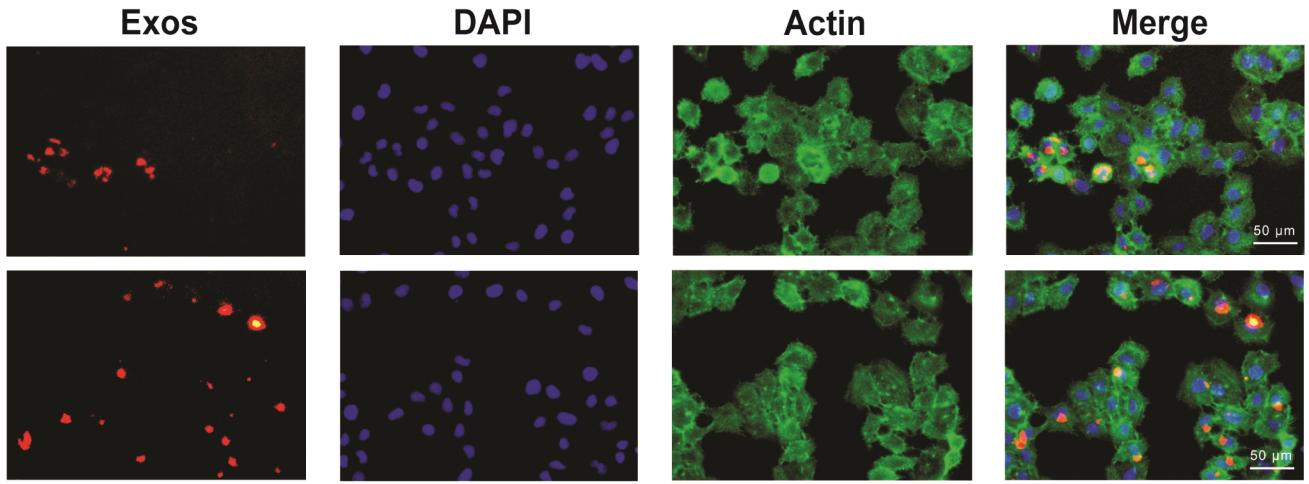

**B**

| Frequency of colony formation |           | Number of cells seeded each well |     |     |     |     |     |     |     | T-ICs Frequency |                        | p Value          |                    |
|-------------------------------|-----------|----------------------------------|-----|-----|-----|-----|-----|-----|-----|-----------------|------------------------|------------------|--------------------|
|                               |           | 500                              | 250 | 125 | 80  | 40  | 20  | 10  | 5   | Estimate        | Upper and Lower Limits | Ratio Of prop.'s | Ratio of prop.'s=1 |
| SMMC-7721                     | +NLTi Exo | 8/8                              | 6/8 | 5/8 | 4/8 | 2/8 | 0/8 | 0/8 | 0/8 | 1:151           | 1:97-1:235             |                  |                    |
|                               | +LTI Exo  | 8/8                              | 8/8 | 8/8 | 7/8 | 5/8 | 3/8 | 3/8 | 2/8 | 1:33            | 1:21-1:52              | 0.218            | 0.0001             |

**C**

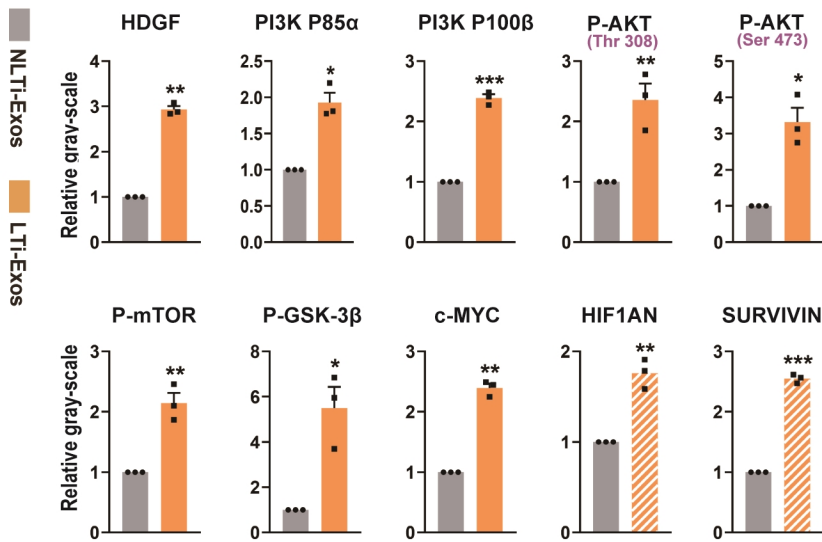

**Figure S3**

**A**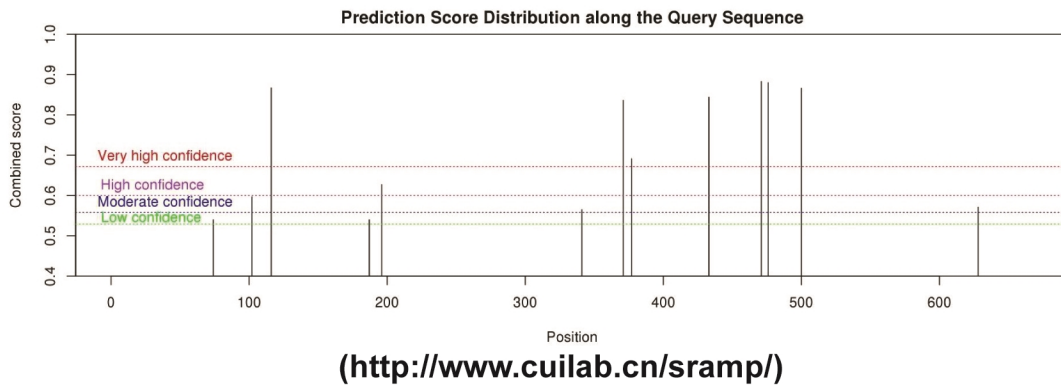**B**

| Position | Score (binary) | Score (knn) | Score (spectrum) | Score (combined) |
|----------|----------------|-------------|------------------|------------------|
| 74       | 0.426          | 0.584       | 0.692            | 0.540            |
| 102      | 0.468          | 0.619       | 0.773            | 0.597            |
| 116      | 0.911          | 0.789       | 0.816            | 0.867            |
| 187      | 0.473          | 0.515       | 0.636            | 0.540            |
| 196      | 0.596          | 0.733       | 0.657            | 0.627            |
| 341      | 0.470          | 0.682       | 0.681            | 0.565            |
| 371      | 0.812          | 0.638       | 0.894            | 0.836            |
| 377      | 0.620          | 0.802       | 0.775            | 0.691            |
| 433      | 0.833          | 0.675       | 0.882            | 0.844            |
| 471      | 0.856          | 0.733       | 0.940            | 0.883            |
| 476      | 0.846          | 0.673       | 0.952            | 0.880            |
| 500      | 0.878          | 0.551       | 0.889            | 0.866            |
| 628      | 0.536          | 0.765       | 0.597            | 0.571            |

**Figure S4**

**A**

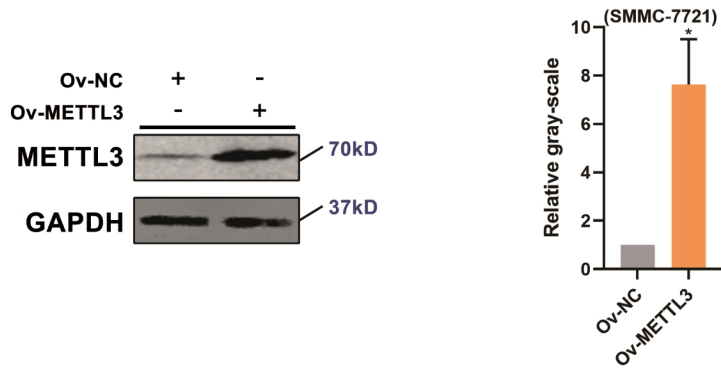

**B**

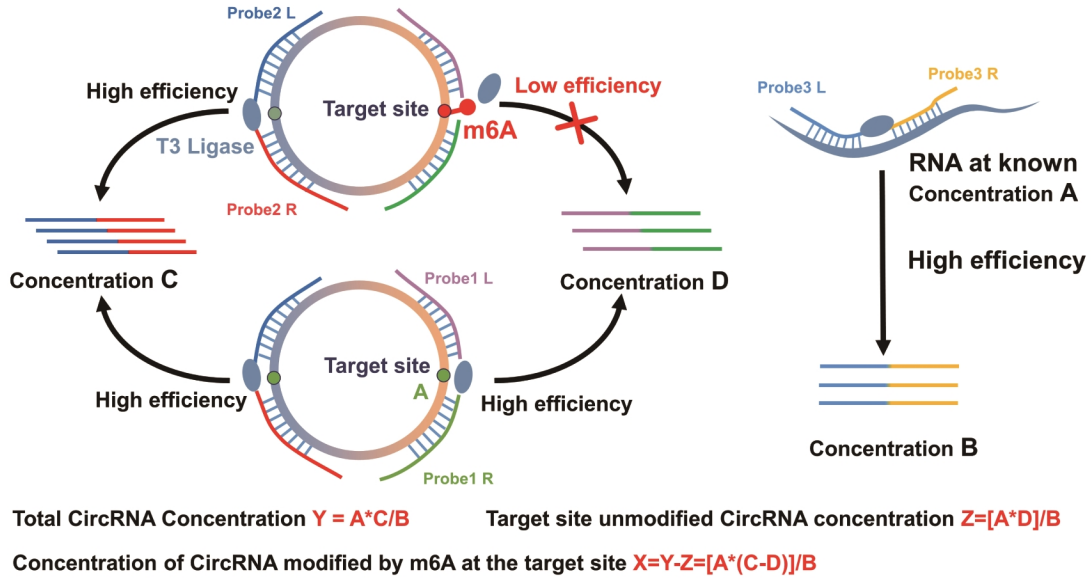

**Figure S5**

**A**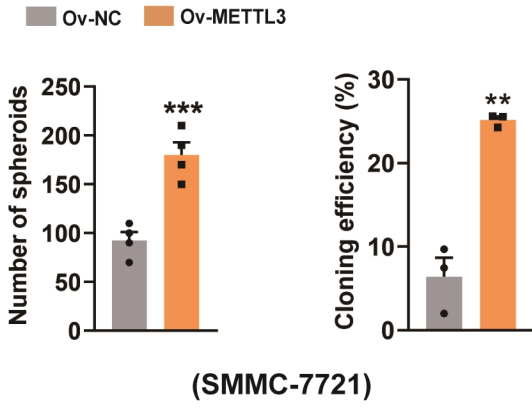**B**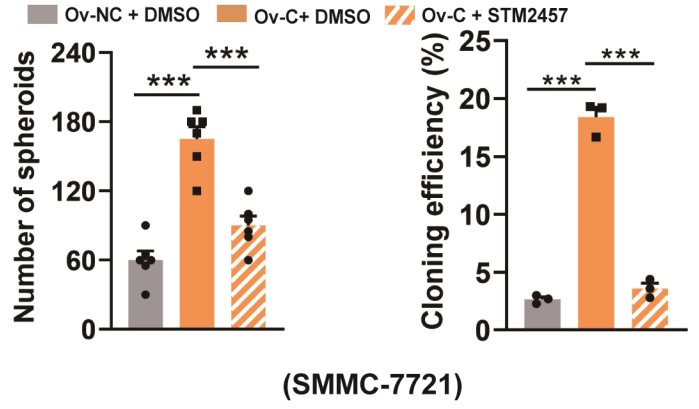**C**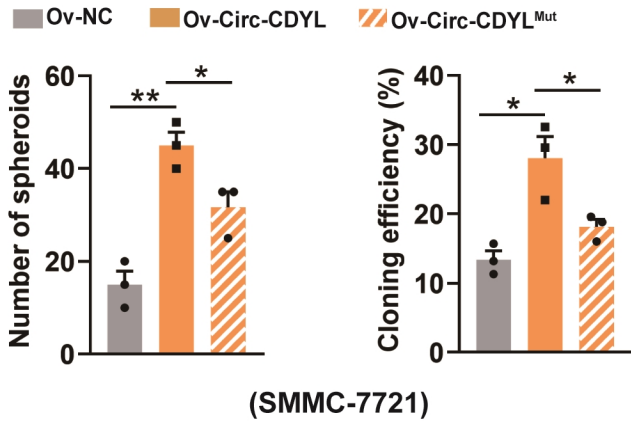**Figure S6**

**A**

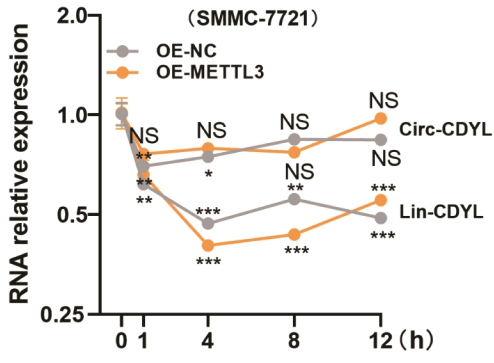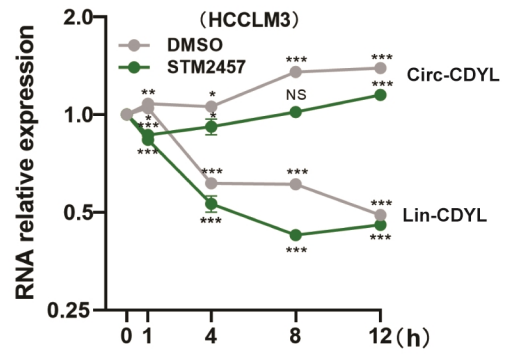

**B**

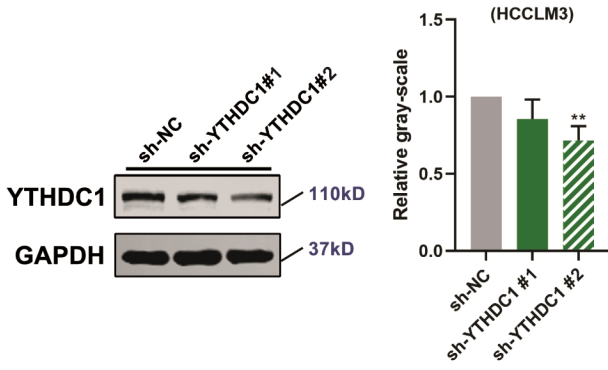

**C**

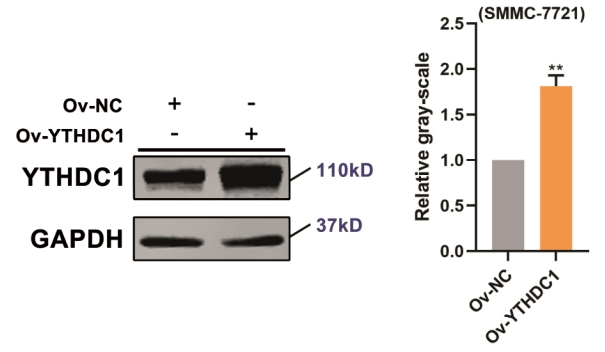

**D**

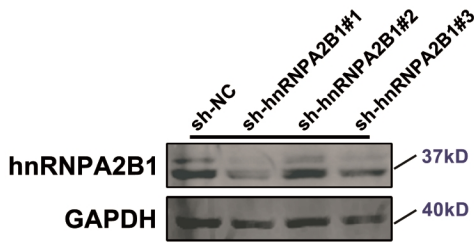

**Figure S7**



1 **Supplementary Figure Legends**

2 ***Figure S1. Identification of exosomes isolated from the cell culture medium of HCC cell***  
3 ***line, Related to Figure 1***

4 (A) Size distribution of exosomes purified from the culture medium of HCCLM3 cells using  
5 differential ultracentrifugation methods. (B) Representative electron microscopy images of  
6 exosomes secreted from parental cells. (C) Western blot analysis of positive exosomes surface  
7 markers (TSG101, HSP70, and CD63) and a negative marker (Calnexin) on HCCLM3 cells and  
8 cell-derived exosomes, respectively.

9

10 ***Figure S2. Circ-CDYL did not significantly regulate the proportion of CD133- and CD24-***  
11 ***positive cells, Related to Figure 1 and Figure 2***

12 (A) The intracellular expression of Circ-CDYL in attached cells and spheroids cultured in low-  
13 attachment culture plates of Circ-CDYL ectopically expressed and knockdown HCC cells, as  
14 determined by RT-qPCR assay. (B-C) The percentage of CD133<sup>+</sup> cells (B) and CD24<sup>+</sup> cells (C)  
15 determined by flow cytometry in Circ-CDYL ectopically expressed and knockdown HCC cells.

16

17 ***Figure S3. Exosomes uptake and stemness promotion when cocultured with HCC cells,***  
18 ***Related to Figure 2***

19 (A) LTI-Exos were isolated from the cell supernatant of Circ-CDYL-overexpressing SMMC-7721  
20 cells using ultracentrifugation and dyed with PKH26 (red). The recipient SMMC-7721 cells were  
21 dyed with DAPI (blue) and actin-tracker probe (green). (B) The limiting dilution assay after  
22 incubation with LTI-Exos or NLTi-Exos for 48 h. (C) The grey value of indicated Western blot

23 assay were calculated using Image J software.

24

25 **Figure S4. Bioinformatic analysis of m6A-modified sites on Circ-CDYL, Related to Figure**

26 **3**

27 (A) Predicted m6A-modified sites on Circ-CDYL analyzed by the SRAMP (B) Score of  
28 independent and combined tests of all predicted m6A-modified sites provided by training  
29 datasets of SRAMP. Orange highlight showed the predicted sites with combined score > 0.7.

30

31 **Figure S5. Characterization of METTL3 ectopic cells and MazF-dependent relative**  
32 **quantification assays, Related to Figure 3**

33 (A) Intracellular METTL3 protein expression level in METTL3-overexpressing SMMC-7721 cells  
34 determined by Western blot assay. (B) Mechanism of ligase-dependent absolute quantification  
35 of m6A-modification sites in Circ-CDYL.

36

37 **Figure S6. Cloning efficiency of m6A-modification manipulated HCC cells, Related to**  
38 **Figure 3**

39 (A-C) Cloning efficiency percent in METTL3 ectopic expression or negative control cells (A),  
40 Circ-CDYL overexpression cells treated with DMSO or STM2457 (B), and Circ-CDYL and Circ-  
41 CDYL with mutated m6A-modified sites ectopic expression cells (C) were calculated by the  
42 ratio of clone count: seed cell count.

43

44 **Figure S7. Detection of the half-life of METTL3-modified HCC cells and characterization**

45 **of YTHDC1- or hnRNPA2B1-modified cells, Related to Figure 4 and Figure 6**

46 (A) Circ-CDYL and CDYL mRNA (Lin-CDYL) levels were determined at the indicated times after

47 actinomycin D treatment in METTL3-overexpressing cells and STM2457-treated cells (5  $\mu$ M for

48 48 hours). (B-C) Intracellular YTHDC1 protein expression level in YTHDC1 knockdown

49 HCCLM3 cells (B) and YTHDC1 ectopic expression SMMC-7721 cells (C) determined by

50 Western blot assay. (D) HnRNPA2B1 protein expression level in hnRNPA2B1 knockdown

51 HCCLM3 cells.
