# Supplementary material for: N6-methyladenosine modification promotes hepatocarcinogenesis through circ-CDYL-enriched and EpCAM-positive liver tumor-initiating exosomes
Source: PubMed Central journal article supplement — iScience. 2023 Oct 13;26(10):108022. doi: 10.1016/j.isci.2023.108022 (PMC10638478; doi:10.1016/j.isci.2023.108022), 2023-10-13
Supplement: mmc2.pdf [file mmc2.pdf]

**Table S1. Summary of the clinicopathologic variables of the early stages HCC samples utilized for exosomes analysis, related to Figure 7.**

| Variables                         | Number    | Variables                      | Number    |
|-----------------------------------|-----------|--------------------------------|-----------|
| Age (years) *                     | 60(30-70) | PVTT, no: yes                  | 95:0      |
| Sex, F:M                          | 18:77     | Distant metastasis, no: yes    | 95:0      |
| AFP (µg/L), <20:≥20               | 57:38     | Diameter (cm), ≤2: 2-5:>5      | 24:71:0   |
| TBIL(µmol/L), ≤17.1:>17.1         | 49:46     | Tumor number, single: multiple | 95:0      |
| HBsAg, negative: positive         | 28:67     | Differentiation, I :II: III:IV | 0:11:78:6 |
| HBeAg, negative: positive         | 75:20     | Encapsulation, Complete: no    | 90:5      |
| HCV infection, negative: positive | 94:1      | BCLC, 0:A                      | 24:71     |
| Liver cirrhosis, no: yes          | 54:41     |                                |           |

\*Median (range).
