# Supplementary material for: N6-methyladenosine modification promotes hepatocarcinogenesis through circ-CDYL-enriched and EpCAM-positive liver tumor-initiating exosomes
Source: PubMed Central journal article supplement — iScience. 2023 Oct 13;26(10):108022. doi: 10.1016/j.isci.2023.108022 (PMC10638478; doi:10.1016/j.isci.2023.108022), 2023-10-13
Supplement: mmc3.pdf [file mmc3.pdf]

**Table S2. ROC analysis of each variate in the plasma of early stages HCC, related to Figure 7.**

| <b>Variate</b>            | <b>AUC<br/>(95% CI)</b>     | <b>Optimal<br/>Cut Off</b> | <b>SE<br/>(%)</b> | <b>SP<br/>(%)</b> | <b>Youden's<br/>index</b> | <b>PPV<br/>(%)</b> | <b>NPV<br/>(%)</b> | <b>PLR</b>   | <b>NLR</b>  | <b>OR<br/>(95% CI)</b>            |
|---------------------------|-----------------------------|----------------------------|-------------------|-------------------|---------------------------|--------------------|--------------------|--------------|-------------|-----------------------------------|
| <b>Exos<br/>Circ-CDYL</b> | <b>0.88<br/>(0.81,0.93)</b> | <b>1.94</b>                | <b>78.95</b>      | <b>86.96</b>      | <b>0.6591</b>             | <b>92.59</b>       | <b>66.67</b>       | <b>6.05</b>  | <b>0.24</b> | <b>2.12<br/>(1.55,2.91)</b>       |
| <b>EPCAM+ %</b>           | <b>0.80<br/>(0.72,0.86)</b> | <b>1.11</b>                | <b>73.68</b>      | <b>80.43</b>      | <b>0.5411</b>             | <b>87.50</b>       | <b>53.62</b>       | <b>3.77</b>  | <b>0.33</b> | <b>2.82<br/>(1.75,4.53)</b>       |
| <b>LTi-Exos</b>           | <b>0.88<br/>(0.81,0.93)</b> | <b>0.51</b>                | <b>84.21</b>      | <b>84.78</b>      | <b>0.6899</b>             | <b>91.95</b>       | <b>72.22</b>       | <b>5.53</b>  | <b>0.19</b> | <b>382.00<br/>(58.38,2499.40)</b> |
| <b>AFP</b>                | <b>0.70<br/>(0.62,0.77)</b> | <b>18.00</b>               | <b>46.32</b>      | <b>97.83</b>      | <b>0.4415</b>             | <b>97.22</b>       | <b>42.86</b>       | <b>21.31</b> | <b>0.55</b> | <b>1.04<br/>(1.00,1.08)</b>       |
| <b>LTi-Exos<br/>+AFP</b>  | <b>0.90<br/>(0.83,0.94)</b> | <b>0.59</b>                | <b>83.16</b>      | <b>91.30</b>      | <b>0.7446</b>             | <b>95.18</b>       | <b>72.41</b>       | <b>9.56</b>  | <b>0.18</b> | <b>494.27<br/>(74.48,3280.05)</b> |
